# Supplementary material for: SARS-CoV-2 viral load predicts the severity and mortality in patients with cancer
Source: Research Square preprint supplement (doi:10.21203/rs.3.rs-400301/v1), 2021-04-07
Supplement: Supplementary file 1 [file 2cecc59fd6df34d29331dc24.docx]

| Supplementary table S7. Comparison of different factors associated with High SARS-CoV-2 viral load. | | | | |
| --- | --- | --- | --- | --- |
|  | Odds ratio; [95% CI]; p-value | | | |
| Variables | Severity | Death | ICU | IMV |
| Cancer vs non-cancer | 1.42 [1.17-3.003]  P < 0.0001 | 1.60 [1.27-3.25]  p = 0.00016 | 1.25 [1.07-2.81]  p = 0.00029 | 1.10 [0.91-2.38]  p = 0.098 |
